# Supplementary material for: Identification of genes that are essential to restrict genome duplication to once per cell division
Source: PubMed Central journal article supplement (PMC5085202; doi:10.18632/oncotarget.9008), 2016-04-26
Supplement: oncotarget-07-34956-s001.pdf [file oncotarget-07-34956-s001.pdf]

SUPPLEMENTARY FIGURES

A

| apopt.    | G1 | S | G2/M | excess |    |    |     |      |           |      | Cell count | % <2N DNA | % G1 phase | % S phase | % G2/M | % ≥5N DNA | Gene |
|-----------|----|---|------|--------|----|----|-----|------|-----------|------|------------|-----------|------------|-----------|--------|-----------|------|
|           |    |   |      | <2N    | 2N | 4N | ≥5N | ~12N | 400 - max |      |            |           |            |           |        |           |      |
| 0 - 16    |    |   |      |        |    |    |     |      |           |      |            |           |            |           |        |           |      |
| 17 - 32   |    |   |      |        |    |    |     |      |           |      |            |           |            |           |        |           |      |
| 33 - 49   |    |   |      |        |    |    |     |      |           |      |            |           |            |           |        |           |      |
| 50 - 66   |    |   |      |        |    |    |     |      |           |      |            |           |            |           |        |           |      |
| 67 - 82   |    |   |      |        |    |    |     |      |           |      |            |           |            |           |        |           |      |
| 83 - 99   |    |   |      |        |    |    |     |      |           |      |            |           |            |           |        |           |      |
| 100 - 116 |    |   |      |        |    |    |     |      |           |      |            |           |            |           |        |           |      |
| 117 - 132 |    |   |      |        |    |    |     |      |           |      |            |           |            |           |        |           |      |
| 133 - 149 |    |   |      |        |    |    |     |      |           |      |            |           |            |           |        |           |      |
| 150 - 166 |    |   |      |        |    |    |     |      |           |      |            |           |            |           |        |           |      |
| 167 - 182 |    |   |      |        |    |    |     |      |           |      |            |           |            |           |        |           |      |
| 183 - 199 |    |   |      |        |    |    |     |      |           |      |            |           |            |           |        |           |      |
| 200 - 216 |    |   |      |        |    |    |     |      |           |      |            |           |            |           |        |           |      |
| 217 - 232 |    |   |      |        |    |    |     |      |           |      |            |           |            |           |        |           |      |
| 233 - 149 |    |   |      |        |    |    |     |      |           |      |            |           |            |           |        |           |      |
| 250 - 266 |    |   |      |        |    |    |     |      |           |      |            |           |            |           |        |           |      |
| 267 - 282 |    |   |      |        |    |    |     |      |           |      |            |           |            |           |        |           |      |
| 283 - 299 |    |   |      |        |    |    |     |      |           |      |            |           |            |           |        |           |      |
| 300 - 316 |    |   |      |        |    |    |     |      |           |      |            |           |            |           |        |           |      |
| 317 - 332 |    |   |      |        |    |    |     |      |           |      |            |           |            |           |        |           |      |
| 333 - 349 |    |   |      |        |    |    |     |      |           |      |            |           |            |           |        |           |      |
| 350 - 366 |    |   |      |        |    |    |     |      |           |      |            |           |            |           |        |           |      |
| 367 - 382 |    |   |      |        |    |    |     |      |           |      |            |           |            |           |        |           |      |
| 383 - 399 |    |   |      |        |    |    |     |      |           |      |            |           |            |           |        |           |      |
| 400 - max |    |   |      |        |    |    |     |      |           |      |            |           |            |           |        |           |      |
|           |    |   |      |        |    |    |     |      |           | 5074 | 11         | 39        | 8          | 17        | 11     | control   |      |
|           |    |   |      |        |    |    |     |      |           | 375  | 14         | 8         | 6          | 10        | 62     | FBXO5     |      |
|           |    |   |      |        |    |    |     |      |           | 513  | 8          | 8         | 11         | 20        | 53     | TPX2      |      |
|           |    |   |      |        |    |    |     |      |           | 419  | 12         | 17        | 9          | 16        | 47     | INCENP    |      |
|           |    |   |      |        |    |    |     |      |           | 765  | 16         | 17        | 8          | 13        | 47     | GMNN      |      |
|           |    |   |      |        |    |    |     |      |           | 962  | 14         | 17        | 12         | 12        | 46     | BIRC5     |      |
|           |    |   |      |        |    |    |     |      |           | 1606 | 14         | 18        | 10         | 13        | 45     | ESPL1     |      |
|           |    |   |      |        |    |    |     |      |           | 1800 | 11         | 16        | 13         | 17        | 43     | TOP2A     |      |
|           |    |   |      |        |    |    |     |      |           | 569  | 13         | 20        | 11         | 14        | 42     | CDCA5     |      |
|           |    |   |      |        |    |    |     |      |           | 959  | 14         | 20        | 10         | 14        | 42     | CDCA8     |      |
|           |    |   |      |        |    |    |     |      |           | 1104 | 10         | 20        | 9          | 19        | 42     | CUL1      |      |
|           |    |   |      |        |    |    |     |      |           | 228  | 12         | 14        | 11         | 22        | 40     | PLK1      |      |
|           |    |   |      |        |    |    |     |      |           | 245  | 8          | 9         | 6          | 33        | 39     | KIF11     |      |
|           |    |   |      |        |    |    |     |      |           | 869  | 10         | 22        | 11         | 19        | 38     | ANLN      |      |
|           |    |   |      |        |    |    |     |      |           | 500  | 15         | 23        | 12         | 12        | 37     | AURKB     |      |
|           |    |   |      |        |    |    |     |      |           | 1577 | 9          | 26        | 15         | 16        | 34     | PRC1      |      |
|           |    |   |      |        |    |    |     |      |           | 721  | 5          | 25        | 14         | 22        | 34     | LOC728689 |      |
|           |    |   |      |        |    |    |     |      |           | 773  | 10         | 24        | 13         | 21        | 33     | CASC5     |      |
|           |    |   |      |        |    |    |     |      |           | 2876 | 6          | 30        | 14         | 18        | 33     | PPP2R1A   |      |
|           |    |   |      |        |    |    |     |      |           | 1329 | 7          | 22        | 14         | 25        | 33     | NEDD8     |      |
|           |    |   |      |        |    |    |     |      |           | 552  | 10         | 22        | 11         | 24        | 33     | CHMP2A    |      |
|           |    |   |      |        |    |    |     |      |           | 2873 | 11         | 20        | 13         | 24        | 32     | LIN54     |      |
|           |    |   |      |        |    |    |     |      |           | 3381 | 9          | 27        | 13         | 19        | 32     | SGOL1     |      |
|           |    |   |      |        |    |    |     |      |           | 2177 | 8          | 31        | 13         | 16        | 32     | BBC3      |      |
|           |    |   |      |        |    |    |     |      |           | 1300 | 13         | 19        | 15         | 22        | 32     | FLJ40448  |      |
|           |    |   |      |        |    |    |     |      |           | 2398 | 6          | 17        | 14         | 33        | 31     | LIN9      |      |
|           |    |   |      |        |    |    |     |      |           | 1154 | 16         | 22        | 13         | 18        | 31     | KIF23     |      |
|           |    |   |      |        |    |    |     |      |           | 895  | 10         | 31        | 13         | 14        | 31     | ARD1A     |      |
|           |    |   |      |        |    |    |     |      |           | 1136 | 9          | 19        | 19         | 23        | 31     | METT11D1  |      |
|           |    |   |      |        |    |    |     |      |           | 1475 | 12         | 28        | 17         | 13        | 31     | WDR78     |      |
|           |    |   |      |        |    |    |     |      |           | 993  | 10         | 29        | 13         | 16        | 31     | KIAA1383  |      |
|           |    |   |      |        |    |    |     |      |           | 1825 | 7          | 29        | 12         | 22        | 31     | LIN37     |      |
|           |    |   |      |        |    |    |     |      |           | 3590 | 7          | 21        | 15         | 28        | 30     | CDC26     |      |
|           |    |   |      |        |    |    |     |      |           | 555  | 8          | 18        | 16         | 27        | 30     | CDC27     |      |
|           |    |   |      |        |    |    |     |      |           | 772  | 11         | 29        | 12         | 19        | 30     | CEP192    |      |
|           |    |   |      |        |    |    |     |      |           | 2702 | 12         | 25        | 15         | 19        | 30     | BUB3      |      |
|           |    |   |      |        |    |    |     |      |           | 1898 | 7          | 21        | 19         | 23        | 30     | RBX1      |      |
|           |    |   |      |        |    |    |     |      |           | 854  | 10         | 16        | 14         | 32        | 30     | DTL       |      |
|           |    |   |      |        |    |    |     |      |           | 786  | 12         | 29        | 14         | 15        | 30     | MSRB2     |      |
|           |    |   |      |        |    |    |     |      |           | 1305 | 8          | 34        | 12         | 17        | 30     | CRKL      |      |
|           |    |   |      |        |    |    |     |      |           | 1420 | 13         | 29        | 5          | 21        | 29     | CCNB1     |      |
|           |    |   |      |        |    |    |     |      |           | 1746 | 9          | 26        | 16         | 21        | 29     | WDR51A    |      |
|           |    |   |      |        |    |    |     |      |           | 2179 | 9          | 26        | 15         | 21        | 29     | BUB1B     |      |

(Continued)

**B**

| apopt.     | G1        | S          | G2/M      | excess |           | Gene     |
|------------|-----------|------------|-----------|--------|-----------|----------|
|            |           |            |           | <2N    | ≥5N       |          |
| 0-16       | 2N        |            | 4N        | ≥5N    | ~12N      |          |
| 17-32      |           |            |           |        |           |          |
| 33-49      |           |            |           |        |           |          |
| 50-66      |           |            |           |        |           |          |
| 67-82      |           |            |           |        |           |          |
| 83-99      |           |            |           |        |           |          |
| 100-116    |           |            |           |        |           |          |
| 117-132    |           |            |           |        |           |          |
| 133-149    |           |            |           |        |           |          |
| 150-166    |           |            |           |        |           |          |
| 167-182    |           |            |           |        |           |          |
| 183-199    |           |            |           |        |           |          |
| 200-216    |           |            |           |        |           |          |
| 217-232    |           |            |           |        |           |          |
| 233-249    |           |            |           |        |           |          |
| 250-266    |           |            |           |        |           |          |
| 267-282    |           |            |           |        |           |          |
| 283-299    |           |            |           |        |           |          |
| 300-316    |           |            |           |        |           |          |
| 317-332    |           |            |           |        |           |          |
| 333-349    |           |            |           |        |           |          |
| 350-366    |           |            |           |        |           |          |
| 367-382    |           |            |           |        |           |          |
| 383-399    |           |            |           |        |           |          |
| 400-max    |           |            |           |        |           |          |
| Cell count | % <2N DNA | % G1 phase | % S phase | % G2/M | % ≥5N DNA |          |
| 5074       | 11        | 39         | 8         | 17     | 11        | control  |
| 1627       | 10        | 30         | 11        | 20     | 29        | SMC2     |
| 2561       | 8         | 29         | 15        | 20     | 29        | RACGAP1  |
| 814        | 6         | 36         | 13        | 16     | 29        | FAU      |
| 1463       | 6         | 37         | 13        | 15     | 29        | SMAD2    |
| 1341       | 11        | 29         | 15        | 17     | 29        | NCAPD3   |
| 848        | 9         | 27         | 15        | 20     | 29        | CDC40    |
| 1250       | 7         | 36         | 13        | 16     | 29        | ISG15    |
| 1606       | 7         | 31         | 16        | 18     | 29        | PHF17    |
| 2124       | 10        | 31         | 15        | 16     | 29        | SC65     |
| 1860       | 8         | 30         | 15        | 18     | 29        | SFRS2IP  |
| 1969       | 8         | 32         | 16        | 15     | 29        | C2orf63  |
| 2826       | 6         | 30         | 15        | 21     | 28        | MASTL    |
| 335        | 13        | 25         | 13        | 22     | 28        | AURKA    |
| 1175       | 14        | 25         | 15        | 19     | 28        | ECT2     |
| 3520       | 9         | 29         | 16        | 19     | 28        | C1orf158 |
| 1366       | 10        | 28         | 14        | 20     | 28        | REXO4    |
| 1323       | 10        | 31         | 14        | 17     | 28        | LOX      |
| 2627       | 6         | 31         | 15        | 20     | 28        | RANBP2   |
| 2724       | 6         | 32         | 13        | 22     | 28        | RBM47    |
| 2579       | 11        | 27         | 15        | 18     | 28        | MIPOL1   |
| 573        | 8         | 30         | 16        | 19     | 28        | MUM1     |
| 1689       | 6         | 25         | 13        | 27     | 28        | SAMD3    |
| 1553       | 11        | 27         | 14        | 20     | 28        | UBQLNL   |
| 881        | 12        | 28         | 14        | 19     | 27        | MAD2L1   |
| 1793       | 13        | 26         | 12        | 22     | 27        | SMC4     |
| 2006       | 10        | 27         | 15        | 20     | 27        | TTK      |
| 1797       | 10        | 31         | 13        | 18     | 27        | CHMP4B   |
| 3755       | 7         | 34         | 14        | 17     | 27        | FBXO22   |
| 1141       | 10        | 36         | 13        | 15     | 27        | TELO2    |
| 3853       | 6         | 33         | 17        | 17     | 27        | MGC16169 |
| 2134       | 7         | 36         | 15        | 16     | 27        | FERMT2   |
| 584        | 14        | 28         | 13        | 18     | 27        | BCAR1    |
| 1573       | 11        | 32         | 14        | 15     | 27        | TACC1    |
| 1645       | 8         | 29         | 18        | 19     | 27        | ZNF334   |
| 2175       | 7         | 28         | 16        | 22     | 26        | CDC16    |
| 927        | 16        | 28         | 6         | 18     | 26        | NUF2     |
| 1318       | 4         | 21         | 16        | 34     | 26        | DDB1     |
| 3294       | 5         | 26         | 8         | 28     | 26        | COP2     |
| 1337       | 15        | 28         | 6         | 18     | 26        | FANCD2   |
| 2349       | 5         | 36         | 17        | 16     | 26        | CSE1L    |
| 1091       | 11        | 30         | 15        | 18     | 26        | RAD21    |
| 2661       | 7         | 25         | 16        | 26     | 26        | FBXL13   |
| 1857       | 8         | 39         | 15        | 12     | 26        | FBXL17   |

**Supplementary Figure S1: DNA content analysis results for 85 genes selected for validation.** Each histogram of the DNA content per cell in each well was extrapolated to represent 1000 cells. The fluorescence intensities were distributed into 25 intervals that covered the entire range of detected fluorescence. The results for each siRNA were then plotted as heat-maps in which the intensity of the color was proportional to the number of cells in the interval. In some cases, the position of nuclei with 2N DNA content (G1 phase cells) differed from the controls in the same plate. Differences in the amount of fluorescence per DNA unit that causes shifts in the DNA peaks positions of cell populations are routinely corrected during FACS by adjusting the laser PMT voltage of the instrument until the positions of the 2N or the 4N peak are the same for each sample (1). These data allowed calculation of fraction of cells with nuclear DNA content equivalent to G1 phase (2N), S phase (>2N<4N), G2/M phase (4N), apoptosis (<2N), or EDR (>5N). Gene names are from the Human Gene Nomenclature Committee (HUGO).

**A**

**Origin Licensing Inhibition**

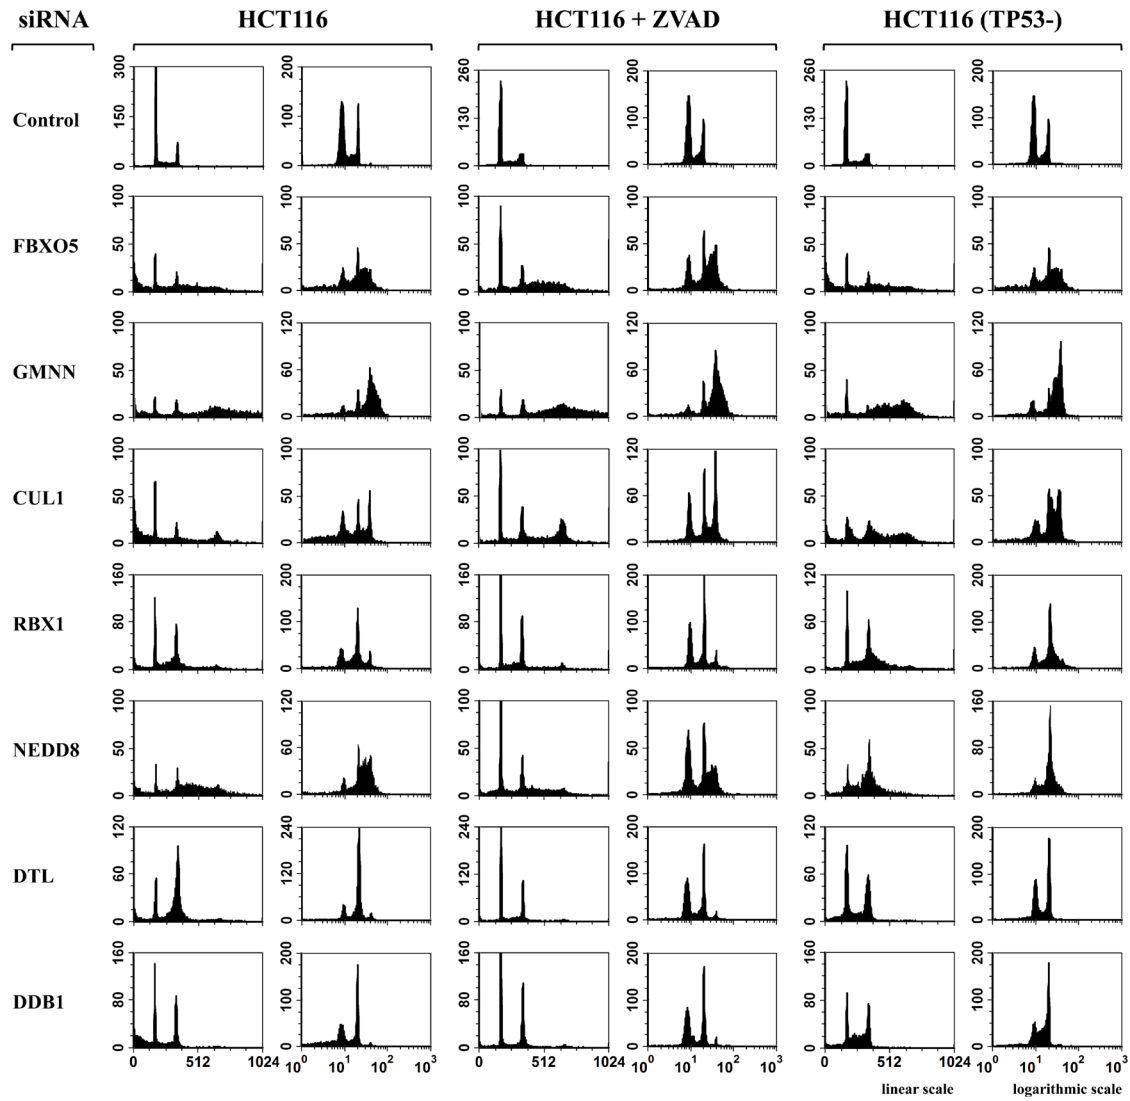

*(Continued)*

**B** Chromatin Untangling, and Mitotic Entry and Maintenance

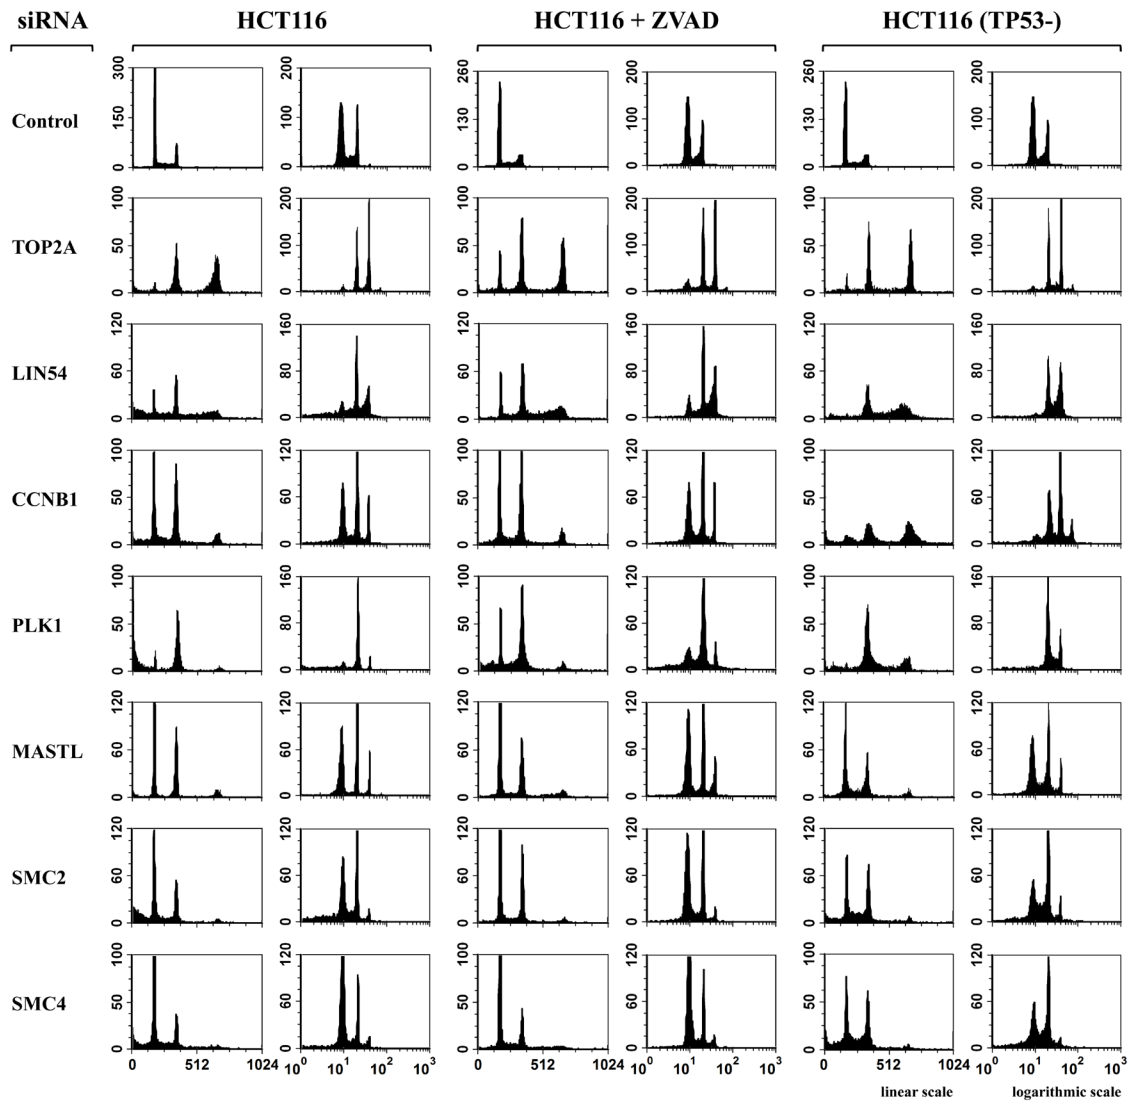

(Continued)

**C** Mitotic Spindle Assembly, Sister Chromatid Cohesion Maintenance

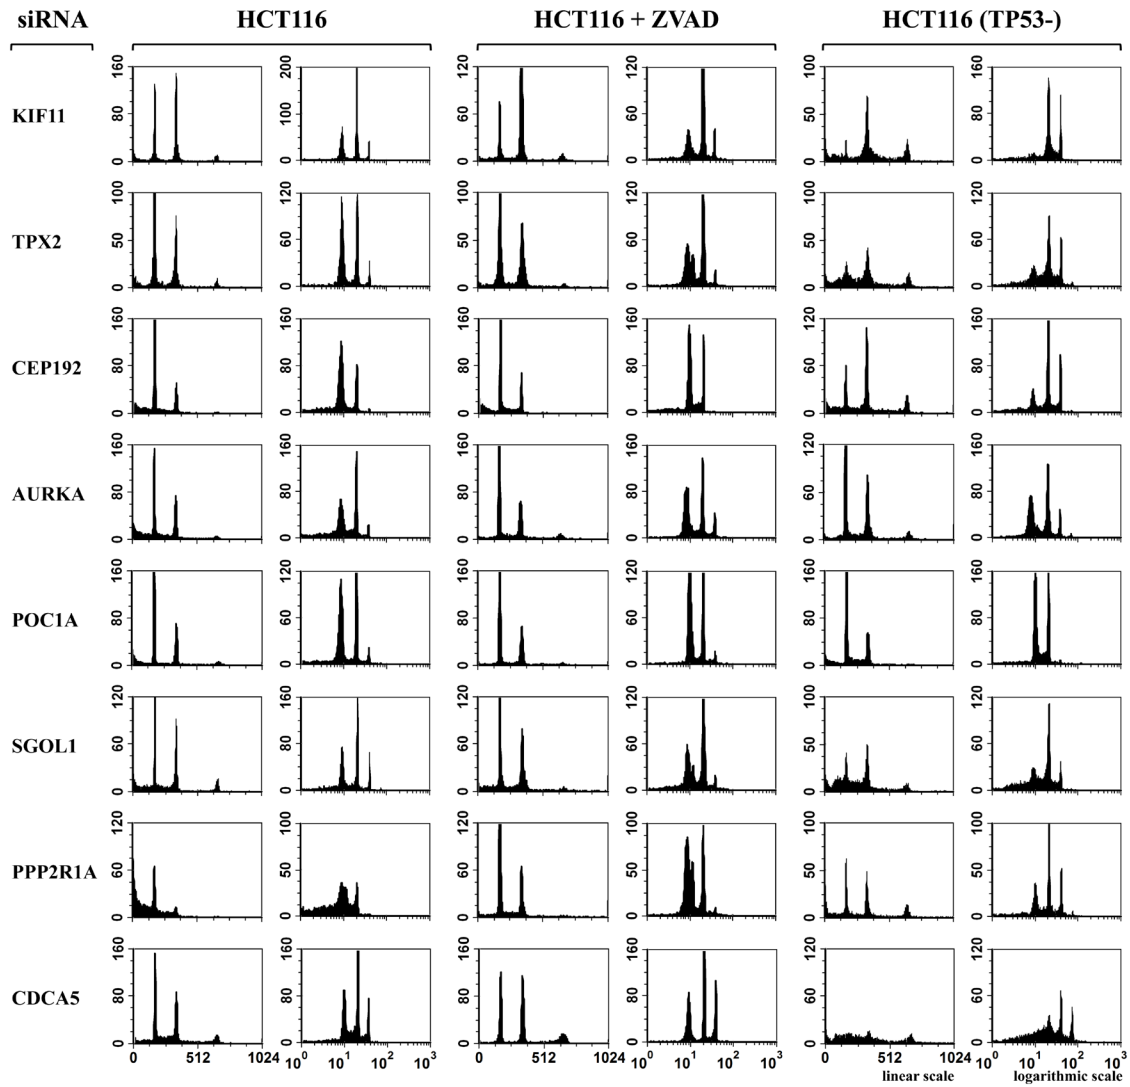

(Continued)

**D**

**Spindle Assembly Checkpoint**

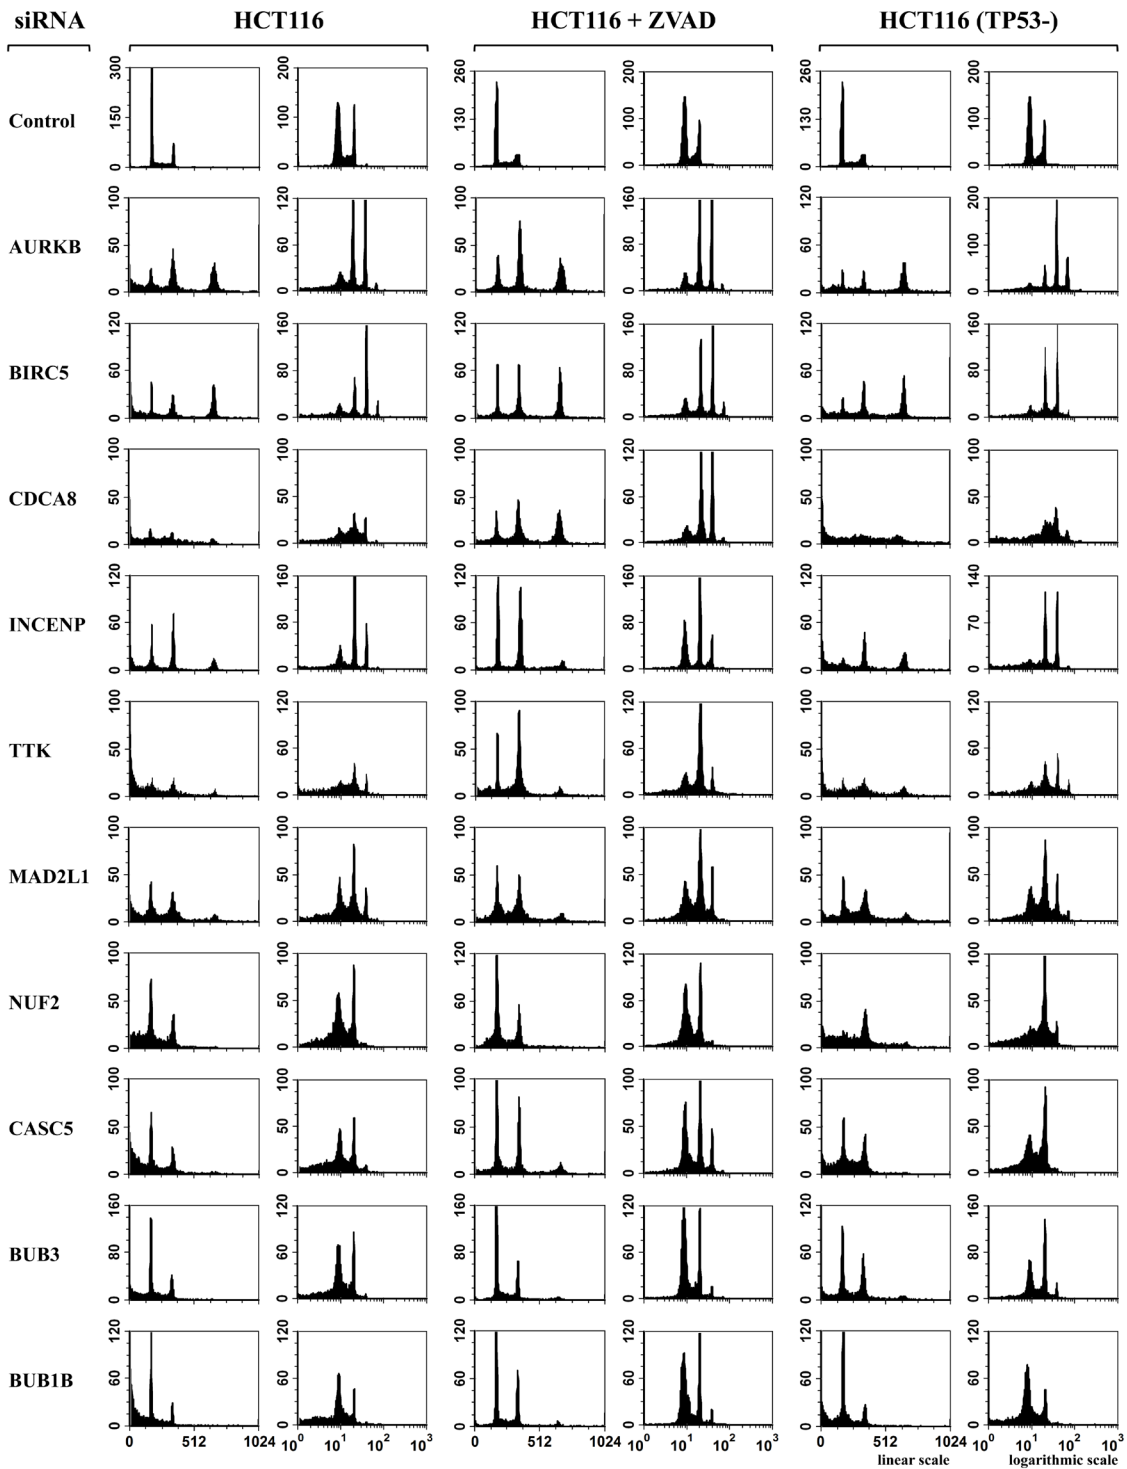

(Continued)

**E** Chromosome Segregation, Cytokinesis

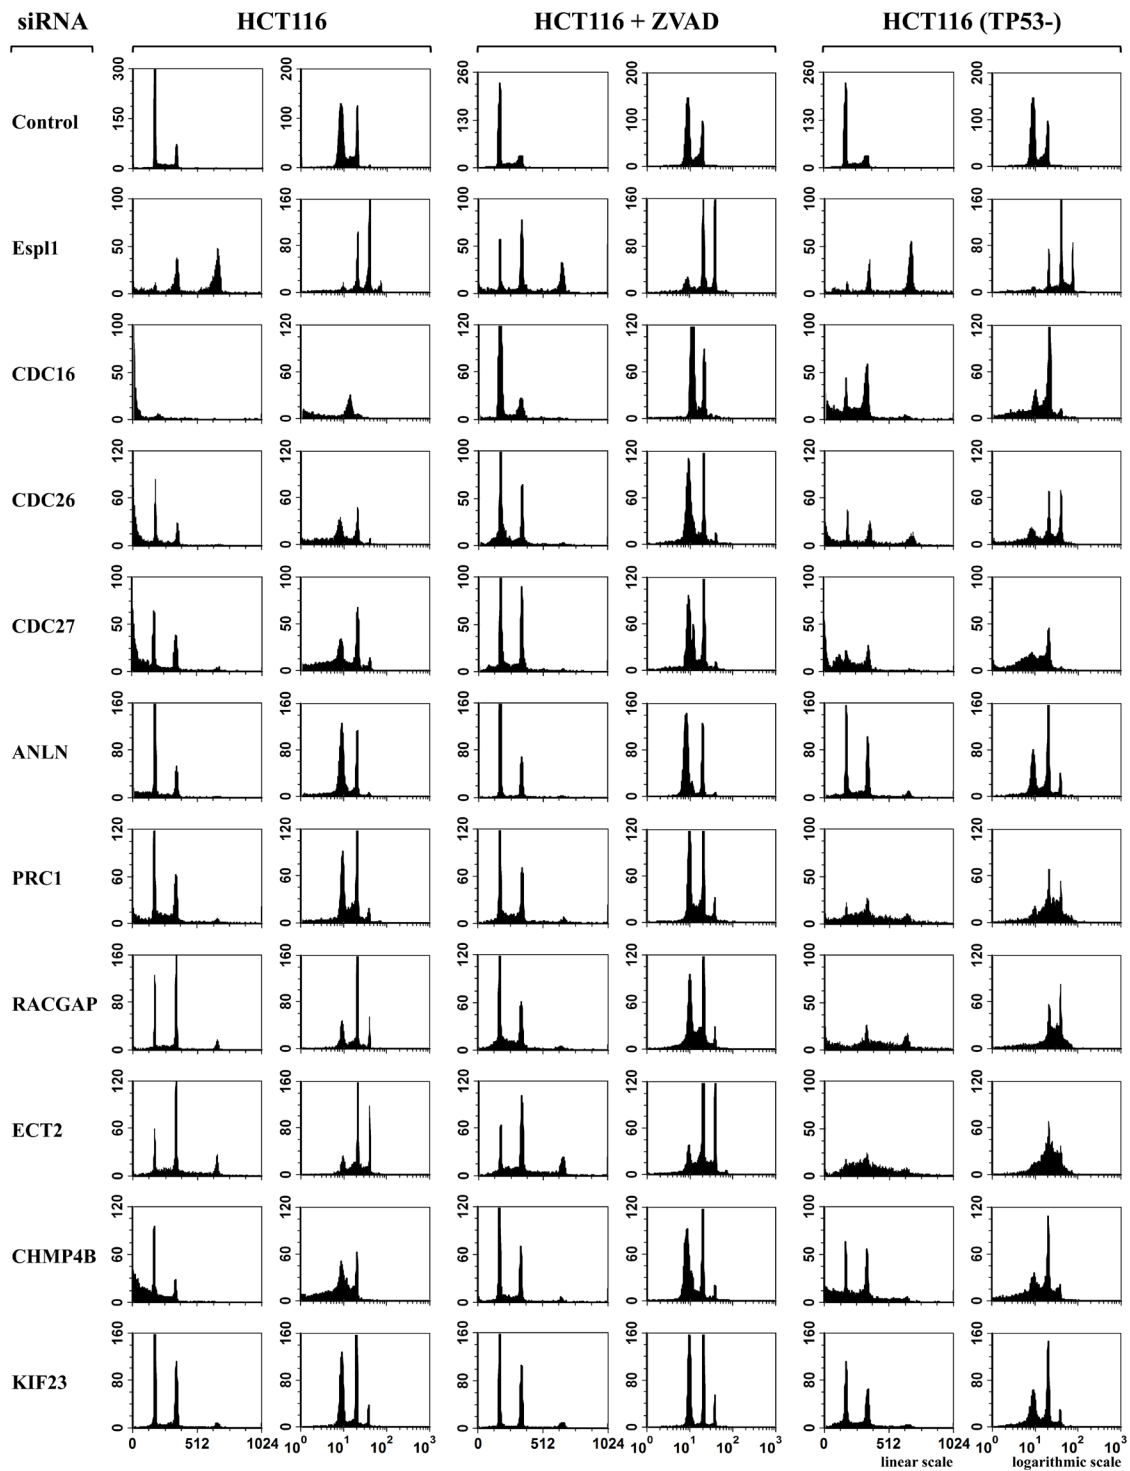

(Continued)

**F**

**Chemical Inhibitors**

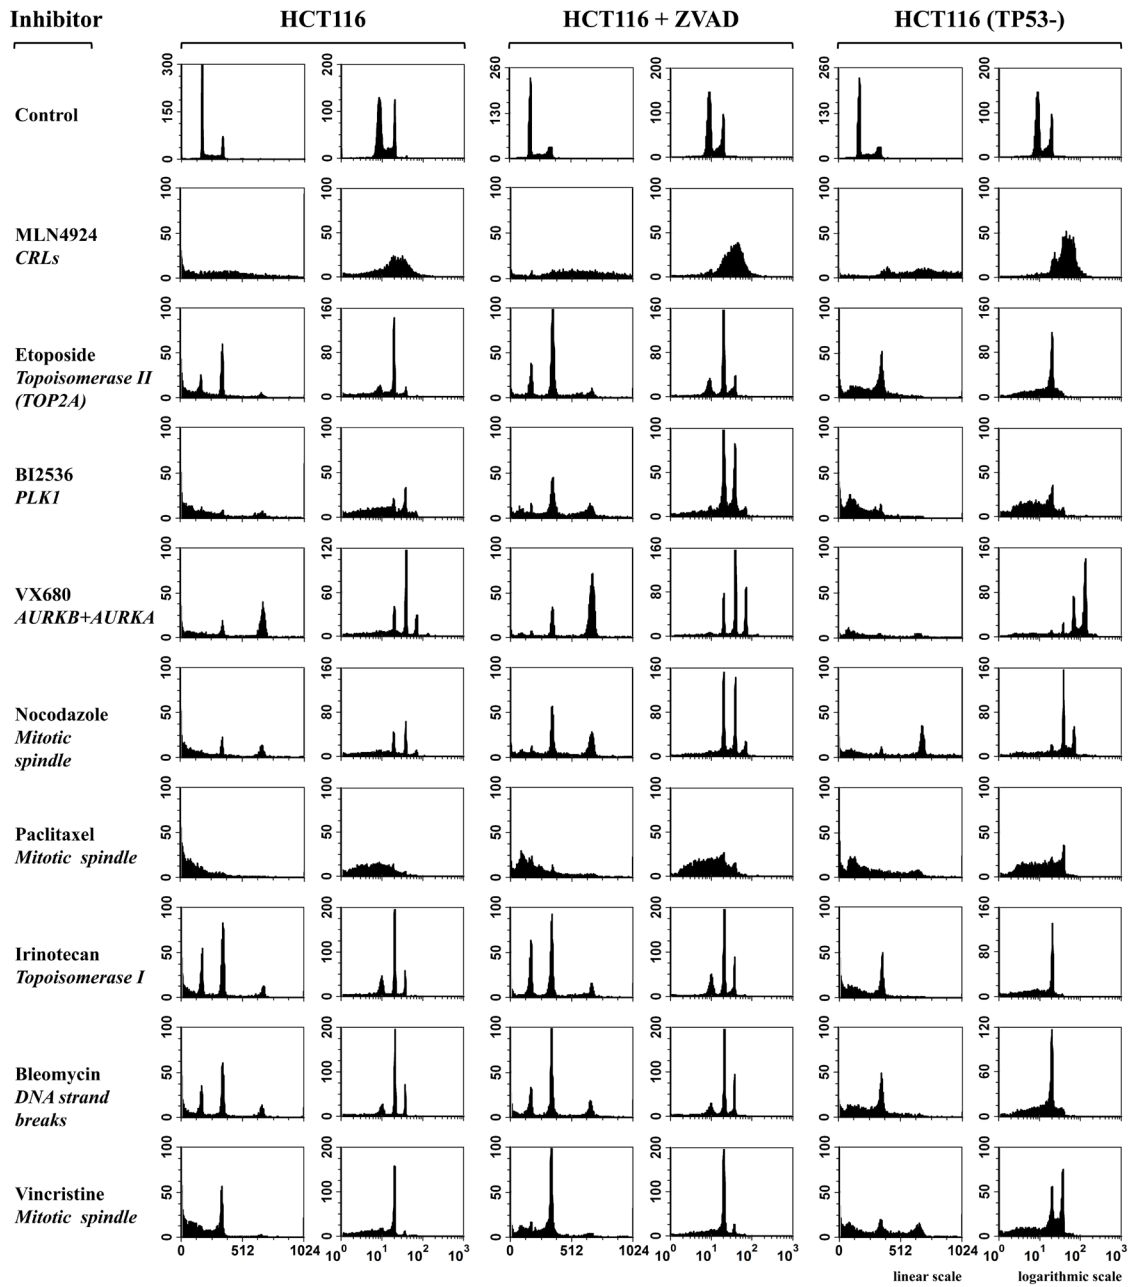

(Continued)



G

Synergistic effects between chemotherapeutic drugs and siRNA

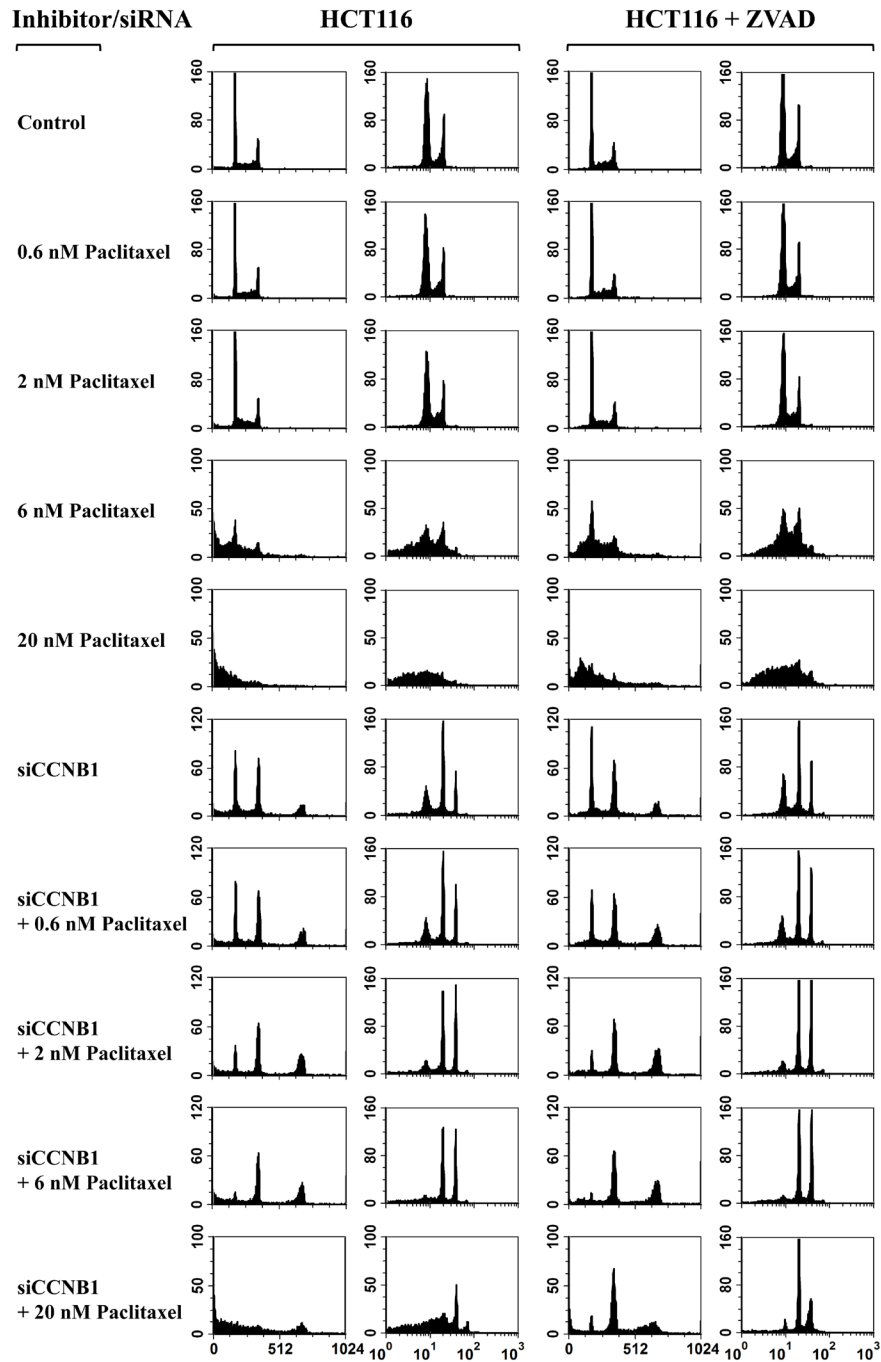

**Supplementary Figure S2: Validation FACS profiles of all genes confirmed as essential for prevention of EDR.** The results of the three validation assays (TP53+ cells, TP53+ cells +ZVAD, and TP53- cells) carried out on each validation siRNA are included. The genes are arranged according to their known function during the cell cycle.

| Gene                                         | HTS    |           | HCT116(TP53+) |         |          |         |         |          | HCT116 (TP53-) |         |          | Total cells (% of control) |       |       | 2N-4N cells (% of control) |       |       | effective siRNAs | ZVAD effect |             | Δ TP53 effect |             |
|----------------------------------------------|--------|-----------|---------------|---------|----------|---------|---------|----------|----------------|---------|----------|----------------------------|-------|-------|----------------------------|-------|-------|------------------|-------------|-------------|---------------|-------------|
|                                              | siRNAs | % >5N DNA | (-)ZVAD       |         |          | (+)ZVAD |         |          | ≥5N DNA        | <2N DNA | abnormal | TP53+                      | +ZVAD | TP53- | TP53+                      | +ZVAD | TP53- |                  | Δ EDR       | Δ Apoptosis | Δ EDR         | Δ Apoptosis |
|                                              |        |           | ≥5N DNA       | <2N DNA | abnormal | ≥5N DNA | <2N DNA | abnormal |                |         |          |                            |       |       |                            |       |       |                  |             |             |               |             |
| control                                      |        | 11        | 1.3           | 3.4     | 4.7      | 1.5     | 5.3     | 6.8      | 1.9            | 3.8     | 5.7      | 100                        | 100   | 100   | 95                         | 93    | 94    | 0                | 2           | 1           | 0             |             |
| <b>Origin Licensing Inhibition</b>           |        |           |               |         |          |         |         |          |                |         |          |                            |       |       |                            |       |       |                  |             |             |               |             |
| FBXO5                                        | 7/7(5) | 62        | 38            | 50      | 88       | 46      | 21      | 67       | 44             | 36      | 80       | 13                         | 18    | 10    | 2                          | 6     | 2     | 8                | 8           | -29         | 6             | -14         |
| GMNN                                         | 7/7(5) | 47        | 59            | 26      | 85       | 73      | 11      | 84       | 62             | 20      | 81       | 21                         | 23    | 23    | 3                          | 4     | 4     | 8                | 15          | -16         | 3             | -7          |
| CUL1                                         | 3/7(5) | 42        | 23            | 52      | 75       | 46      | 13      | 59       | 46             | 23      | 68       | 39                         | 35    | 12    | 10                         | 14    | 4     | 4                | 23          | -40         | 23            | -30         |
| NEDD8                                        | 4/7(5) | 33        | 56            | 17      | 73       | 57      | 10      | 67       | 29             | 11      | 40       | 17                         | 19    | 32    | 5                          | 6     | 19    | 5                | 1           | -8          | -27           | -7          |
| RBX1                                         | 5/7(5) | 30        | 26            | 6       | 32       | 19      | 10      | 28       | 35             | 7       | 42       | 40                         | 19    | 33    | 27                         | 14    | 19    | 6                | -8          | 4           | 9             | 1           |
| DTL                                          | 2/3(3) | 29        | 17            | 14      | 32       | 10      | 9       | 19       | 6              | 14      | 20       | 44                         | 42    | 50    | 30                         | 34    | 40    | 3                | -8          | -5          | -11           | 0           |
| DDB1                                         | 2/3(3) | 26        | 8             | 22      | 30       | 11      | 10      | 21       | 7              | 20      | 26       | 35                         | 31    | 63    | 25                         | 24    | 47    | 3                | 3           | -12         | -1            | -3          |
| <b>Chromatin Untangling</b>                  |        |           |               |         |          |         |         |          |                |         |          |                            |       |       |                            |       |       |                  |             |             |               |             |
| TOP2A                                        | 7/7(5) | 43        | 47            | 22      | 68       | 46      | 14      | 60       | 57             | 10      | 66       | 16                         | 31    | 25    | 5                          | 12    | 8     | 8                | -1          | -8          | 10            | -12         |
| <b>Mitotic Entry and Maintenance</b>         |        |           |               |         |          |         |         |          |                |         |          |                            |       |       |                            |       |       |                  |             |             |               |             |
| LIN54                                        | 2/3(3) | 32        | 29            | 35      | 63       | 45      | 6       | 51       | 56             | 11      | 68       | 35                         | 40    | 27    | 13                         | 20    | 9     | 3                | 16          | -29         | 27            | -24         |
| CCNB1                                        | 4/7(5) | 29        | 17            | 22      | 38       | 17      | 11      | 28       | 57             | 21      | 78       | 35                         | 40    | 18    | 22                         | 29    | 4     | 5                | 1           | -11         | 40            | -1          |
| MASTL                                        | 2/3(3) | 28        | 12            | 9       | 21       | 15      | 6       | 22       | 15             | 9       | 24       | 54                         | 50    | 54    | 43                         | 39    | 41    | 3                | 3           | -3          | 3             | 0           |
| PLK1                                         | 7/7(5) | 40        | 11            | 56      | 67       | 18      | 13      | 31       | 56             | 11      | 68       | 28                         | 32    | 30    | 9                          | 22    | 10    | 8                | 7           | -43         | 45            | -44         |
| SMC2                                         | 3/7(5) | 29        | 6             | 34      | 40       | 9       | 6       | 15       | 13             | 18      | 31       | 40                         | 45    | 55    | 24                         | 38    | 38    | 4                | 2           | -28         | 6             | -16         |
| SMC4                                         | 3/7(3) | 27        | 8             | 22      | 30       | 9       | 7       | 15       | 12             | 24      | 36       | 49                         | 47    | 64    | 34                         | 40    | 41    | 4                | 1           | -15         | 4             | 2           |
| <b>Mitotic Spindle Assembly</b>              |        |           |               |         |          |         |         |          |                |         |          |                            |       |       |                            |       |       |                  |             |             |               |             |
| TPX2                                         | 5/7(5) | 53        | 7             | 20      | 27       | 14      | 12      | 26       | 26             | 26      | 53       | 23                         | 20    | 11    | 17                         | 15    | 5     | 6                | 7           | -8          | 19            | 6           |
| KIF11                                        | 7/7(5) | 39        | 10            | 32      | 42       | 15      | 15      | 30       | 31             | 27      | 58       | 10                         | 13    | 6     | 6                          | 9     | 3     | 8                | 5           | -17         | 22            | -6          |
| CEP192                                       | 2/3(3) | 30        | 2             | 35      | 37       | 3       | 9       | 12       | 26             | 26      | 52       | 37                         | 65    | 44    | 23                         | 57    | 21    | 3                | 1           | -26         | 24            | -9          |
| AURKA                                        | 5/7(5) | 29        | 11            | 27      | 38       | 14      | 8       | 22       | 15             | 12      | 27       | 39                         | 38    | 40    | 24                         | 30    | 29    | 6                | 2           | -18         | 4             | -15         |
| POCIA                                        | 3/7(3) | 29        | 6             | 27      | 33       | 7       | 11      | 17       | 4              | 19      | 23       | 18                         | 25    | 28    | 12                         | 21    | 22    | 4                | 0           | -16         | -2            | -8          |
| <b>Spindle Assembly Checkpoint</b>           |        |           |               |         |          |         |         |          |                |         |          |                            |       |       |                            |       |       |                  |             |             |               |             |
| INCENP                                       | 7/7(5) | 47        | 14            | 39      | 53       | 17      | 11      | 28       | 22             | 49      | 71       | 62                         | 66    | 56    | 29                         | 48    | 16    | 8                | 3           | -28         | 9             | 10          |
| BIRC5                                        | 4/7(5) | 46        | 31            | 23      | 54       | 43      | 12      | 55       | 42             | 23      | 65       | 30                         | 44    | 22    | 14                         | 20    | 8     | 5                | 12          | -11         | 11            | -1          |
| CDCA8                                        | 5/7(5) | 42        | 12            | 67      | 79       | 40      | 22      | 62       | 33             | 48      | 81       | 32                         | 29    | 14    | 7                          | 11    | 3     | 6                | 28          | -45         | 22            | -20         |
| AURKB                                        | 7/7(5) | 37        | 33            | 31      | 64       | 39      | 10      | 49       | 55             | 21      | 76       | 18                         | 25    | 20    | 6                          | 13    | 5     | 8                | 6           | -21         | 22            | -10         |
| CASC5                                        | 4/7(5) | 33        | 6             | 53      | 60       | 18      | 15      | 32       | 6              | 33      | 39       | 31                         | 41    | 57    | 13                         | 28    | 35    | 5                | 12          | -39         | 0             | -21         |
| BUB3                                         | 2/3(3) | 30        | 3             | 38      | 41       | 8       | 7       | 14       | 11             | 24      | 36       | 55                         | 43    | 59    | 32                         | 37    | 38    | 3                | 4           | -31         | 8             | -13         |
| BUB1B                                        | 2/3(3) | 29        | 2             | 65      | 67       | 7       | 8       | 15       | 4              | 32      | 36       | 57                         | 54    | 56    | 19                         | 46    | 36    | 3                | 5           | -57         | 2             | -33         |
| MAD2L1                                       | 2/3(3) | 27        | 17            | 39      | 55       | 25      | 16      | 41       | 27             | 21      | 48       | 34                         | 25    | 49    | 15                         | 15    | 26    | 3                | 9           | -23         | 11            | -18         |
| TTK                                          | 4/7(5) | 27        | 12            | 61      | 73       | 18      | 13      | 31       | 28             | 43      | 71       | 21                         | 23    | 16    | 6                          | 16    | 5     | 5                | 6           | -49         | 16            | -18         |
| NUF2                                         | 2/3(3) | 26        | 6             | 39      | 45       | 9       | 16      | 24       | 20             | 33      | 53       | 43                         | 41    | 20    | 24                         | 31    | 9     | 3                | 3           | -23         | 14            | -6          |
| <b>Sister Chromatid Cohesion Maintenance</b> |        |           |               |         |          |         |         |          |                |         |          |                            |       |       |                            |       |       |                  |             |             |               |             |
| CDCA5                                        | 5/7(5) | 42        | 15            | 47      | 62       | 21      | 9       | 31       | 40             | 28      | 68       | 10                         | 12    | 12    | 4                          | 8     | 4     | 6                | 7           | -38         | 25            | -19         |
| PPP2R1A                                      | 2/7(5) | 33        | 3             | 18      | 20       | 8       | 12      | 20       | 17             | 47      | 64       | 28                         | 30    | 23    | 22                         | 24    | 8     | 3                | 5           | -5          | 14            | 30          |
| SGOL1                                        | 3/7(5) | 32        | 11            | 28      | 39       | 11      | 18      | 29       | 17             | 30      | 47       | 14                         | 33    | 22    | 8                          | 23    | 12    | 4                | 0           | -10         | 6             | 2           |
| <b>Chromosome Segregation</b>                |        |           |               |         |          |         |         |          |                |         |          |                            |       |       |                            |       |       |                  |             |             |               |             |
| ESPL1                                        | 7/7(5) | 45        | 51            | 19      | 69       | 46      | 21      | 67       | 68             | 12      | 80       | 22                         | 20    | 20    | 7                          | 7     | 4     | 8                | -5          | 2           | 17            | -7          |
| CDC16                                        | 2/3(3) | 26        | 2             | 94      | 95       | 7       | 11      | 17       | 8              | 33      | 40       | 87                         | 107   | 82    | 4                          | 88    | 49    | 3                | 5           | -83         | 6             | -61         |
| CDC26                                        | 2/3(3) | 30        | 3             | 62      | 65       | 7       | 14      | 21       | 28             | 39      | 67       | 48                         | 69    | 32    | 17                         | 55    | 11    | 3                | 4           | -48         | 25            | -23         |
| CDC27                                        | 2/3(3) | 30        | 5             | 59      | 64       | 9       | 11      | 20       | 5              | 62      | 67       | 73                         | 80    | 40    | 26                         | 64    | 13    | 3                | 4           | -49         | 0             | 3           |
| <b>Cytokinesis</b>                           |        |           |               |         |          |         |         |          |                |         |          |                            |       |       |                            |       |       |                  |             |             |               |             |
| ANLN                                         | 2/7(5) | 38        | 3             | 23      | 26       | 3       | 3       | 6        | 13             | 9       | 22       | 57                         | 55    | 53    | 42                         | 52    | 41    | 3                | 1           | -21         | 10            | -14         |
| PRC1                                         | 3/7(5) | 34        | 9             | 24      | 33       | 13      | 6       | 19       | 41             | 19      | 60       | 38                         | 34    | 16    | 25                         | 27    | 6     | 4                | 4           | -18         | 32            | -5          |
| RACGAP1                                      | 2/7(5) | 29        | 12            | 9       | 21       | 12      | 13      | 25       | 46             | 32      | 77       | 15                         | 19    | 15    | 12                         | 14    | 3     | 3                | 0           | 4           | 34            | 23          |
| ECT2                                         | 4/7(5) | 28        | 27            | 9       | 36       | 30      | 6       | 36       | 42             | 12      | 54       | 15                         | 16    | 18    | 10                         | 10    | 8     | 5                | 2           | -3          | 15            | 3           |
| CHMP4B                                       | 2/3(3) | 27        | 2             | 57      | 59       | 8       | 12      | 20       | 16             | 36      | 53       | 54                         | 45    | 20    | 22                         | 36    | 10    | 3                | 6           | -45         | 14            | -21         |
| KIF23                                        | 2/7(5) | 26        | 8             | 11      | 19       | 10      | 5       | 15       | 11             | 14      | 25       | 17                         | 12    | 18    | 14                         | 10    | 14    | 3                | 2           | -6          | 3             | 3           |

**Supplementary Figure S3: Genes essential to prevent EDR in HCT116 cells.** HTS siRNAs are the number of positive siRNAs/ number of siRNAs tested in HTS ( $\geq$ MAD value) from 'statistical analysis'. HTS  $\geq$ 5N DNA is the fraction (%) of cells with  $\geq$ 5N nuclear DNA content based on the median of the three siRNAs from DNA content analysis. Total cells are the number of cells counted relative to the number of cells in control (%) at end of experiment (3 days). 'Δ EDR' and 'Δ Apoptosis' are the differences  $\pm$ ZVAD. They were calculated by subtracting the corresponding percentage for the TP53+ assay from the ZVAD assay. 'Δ EDR' and 'Δ Apoptosis' for the TP53 effect were calculated by subtracting the corresponding percentage for the TP53+ assay from the TP53- assay. Red indicates a reduction in EDR or Apoptosis, whereas blue indicates an increase. Gene names are from the Human Gene Nomenclature Committee (HUGO).
